# Supplementary material for: Effects of Melaleuca alternifolia Chell (Tea Tree) and Eucalyptus globulus Labill. Essential Oils on Antibiotic-Resistant Bacterial Biofilms
Source: MDPI journal article supplement (doi:10.3390/molecules28041671), 2023-02-09
Supplement: s1 [file s1]

# Effects of *Melaleuca alternifolia* Chell (Tea Tree) and *Eucalyptus globulus* Labill. Essential Oils on Antibiotic-Resistant Bacterial Biofilms

Ramona Iseppi <sup>1</sup>, Martina Mariani <sup>2</sup>, Stefania Benvenuti<sup>1</sup>, Eleonora Truzzi <sup>1</sup> and Patrizia Messi <sup>1\*</sup>

<sup>1</sup> Department of Life Sciences, University of Modena and Reggio Emilia, Via G. Campi 287, 41125 Modena, Italy

<sup>2</sup> Department of Emergency Surgery, Anesthesia and Intensive Care Unit, A.O.R.N. Antonio Cardarelli, via A. Cardarelli 9, 80131 Naples, Italy

\* Correspondence: patrizia.messi@unimore.it

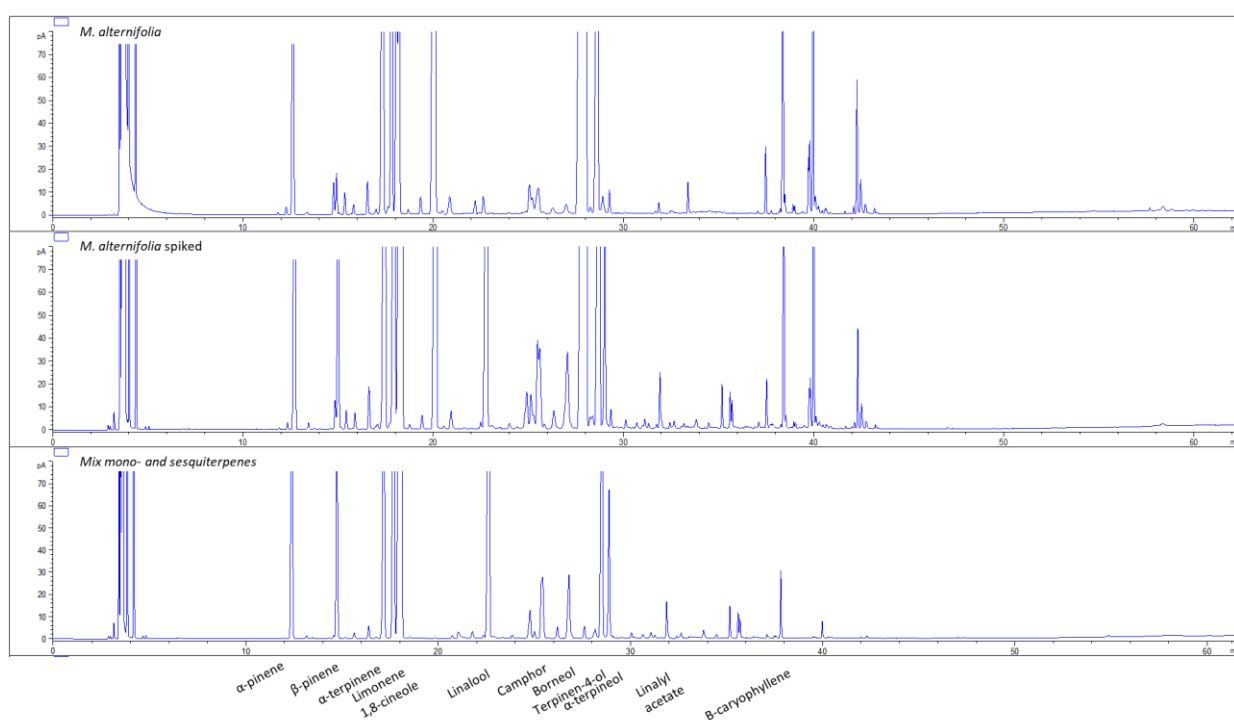

Figure S1: GC chromatograms of pure (a) and spiked (b) *Melaleuca alternifolia* essential oil with most abundant mono- and sesquiterpenes (c).

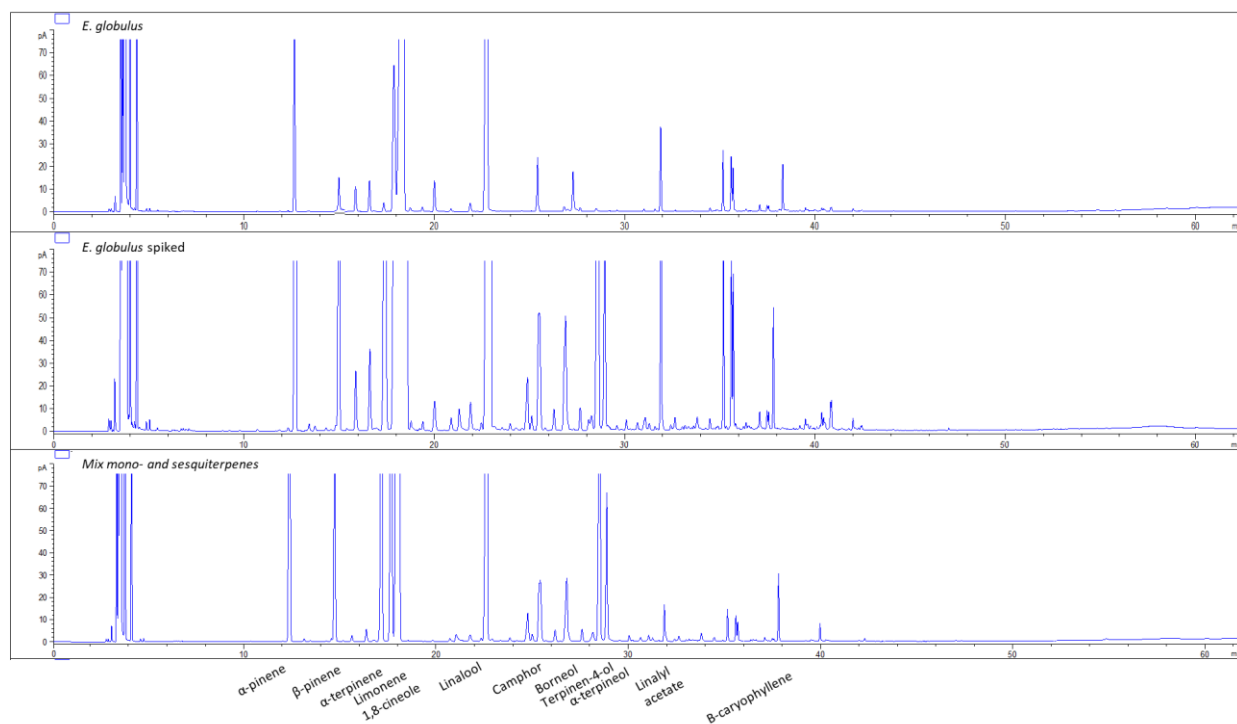

Figure S2: GC chromatograms of pure (a) and spiked (b) *Eucalyptus globulus* essential oil with most abundant mono- and sesquiterpenes (c).
